# Supplementary material
Source: publisher figshare collection journal article supplement (https://sage.figshare.com/ndownloader/files/18531176)
Supplement: Supplementary file 1 [file 18531176]

|   | <b>Study</b>                    | <b>Aim of the programme</b>                                                                                                                                                                                   | <b>Setting</b>   | <b>Sports/activities</b>                                                                             | <b>Theory base or framework</b>                            | <b>Participants</b>                       | <b>Programme length</b> | <b>Sessions</b> | <b>Session length</b> | <b>Frequency of sessions</b> |
|---|---------------------------------|---------------------------------------------------------------------------------------------------------------------------------------------------------------------------------------------------------------|------------------|------------------------------------------------------------------------------------------------------|------------------------------------------------------------|-------------------------------------------|-------------------------|-----------------|-----------------------|------------------------------|
| 3 | Akelaitis and Malinauskas, 2016 | Develop social skills (i.e. communication, cooperation, assertiveness, social self-control and social adaptation)                                                                                             | PE               | Not specified                                                                                        | Not specified                                              | 9th grade high school students            | 8,75 hours              | 35              | 15 min                | Not specified                |
| 4 | Aksoy and Gürsel, 2017          | Improving responsibility according to the 5 TPSR levels                                                                                                                                                       | PE               | Ultimate Frisbee                                                                                     | TPSR in a framework of Kohlberg's moral development theory | 9th grade vocational high school students | 8 weeks                 | Not specified   | 40 min                | 2/week                       |
| 5 | Allen et al., 2015              | Teaching life skills: teamwork, discipline, communication, concentration, persistence, goal-setting, self-confidence and positive self-talk                                                                   | School sports    | American football, martial arts, goalball, rock climbing, sprint hurdling, frisbee, boxing, football | PYD Life skill development and transfer                    | Underachieving boys aged 12 to 13         | 1 school year           | 23              | 75 min                | 1/week                       |
| 6 | Anderson-Butcher et al., 2013   | Learning skills in various sport, fitness, and educational activities with a focus on health/wellness, drug/alcohol prevention, and social competence (specifically problem solving and assertiveness skills) | Summer programme | Volleyball, football, swimming, aerobics, soccer, track, basketball, wiffleball                      | Youth development and Life skill development               | Boys and girls aged 9 to 16               | 4 weeks                 | 20 days         | 5 hours/day           | 5/week                       |

|    |                               |                                                                                                                                                                                                                |                     |                                                                                                 |                                                                                                                                            |                                                                                           |                                     |               |                                                                    |                            |
|----|-------------------------------|----------------------------------------------------------------------------------------------------------------------------------------------------------------------------------------------------------------|---------------------|-------------------------------------------------------------------------------------------------|--------------------------------------------------------------------------------------------------------------------------------------------|-------------------------------------------------------------------------------------------|-------------------------------------|---------------|--------------------------------------------------------------------|----------------------------|
| 7  | Anderson-Butcher et al., 2014 | Fostering social competence (self-control, effort, teamwork and social responsibility), enhancing sense of belonging and connection to the programme, and increasing perceptions of sport competence           | Summer programme    | Basketball, football, lacrosse, health and fitness, soccer, social dance, softball, swimming    | PYD, especially drawing from TPSR, Sports Education, initiative-building concepts, and best practices in youth development skills training | Disadvantaged boys and girls aged                                                         | 4 weeks (19 days)                   | Not specified | 4 hours/day 1h social skills play-based 3x1h sport + social skills | daily (19 days in 4 weeks) |
| 8  | Baena-Extremera et al., 2012  | Promoting emotional, physical and social development                                                                                                                                                           | PE                  | Adventure activities (Challenge and adventure, Climbing techniques, Adventure games and sports) | Adventure Education                                                                                                                        | Boys and girls aged 15 to 16                                                              | 9 weeks                             | 18            | Not specified                                                      | Not specified              |
| 9  | Bean and Forneris, 2016       | Teaching life skills                                                                                                                                                                                           | After-school sports | Not specified                                                                                   | PYD and life skill development                                                                                                             | Boys and girls aged 9 to 18                                                               | 2 to 9 months                       | Not specified | 1 to 3 hours                                                       | Not specified              |
| 10 | Bean, Whitley and Gould, 2014 | Learn and demonstrate sports skills, be with their friends, and be physically active. Promoting the development of positive character and positive life skills. Helping young people grow into healthy adults. | After-school sports | Variety of sports teams, including, basketball, football, track and field, soccer, softball     | PYD, life skill development and character development                                                                                      | Boys and girls aged 10 to 18, approx. half of youth living in poverty and are underserved | Long term with a minimum of 3 years | Not specified | Not specified                                                      | Not specified              |

|    |                                 |                                                                                                                                                                                   |                     |                                                                                                                                                                       |                                                                                                                      |                                                                         |               |               |               |               |
|----|---------------------------------|-----------------------------------------------------------------------------------------------------------------------------------------------------------------------------------|---------------------|-----------------------------------------------------------------------------------------------------------------------------------------------------------------------|----------------------------------------------------------------------------------------------------------------------|-------------------------------------------------------------------------|---------------|---------------|---------------|---------------|
| 13 | Bruening, Dover and Clark, 2009 | Teaching life skills, sports or PA and nutrition lessons                                                                                                                          | After-school sports | Traditional sports (e.g. basketball, track and field, non-traditional sports (e.g. field hockey, swimming, volleyball), other physical activities (e.g. double Dutch) | Based in theories of engagement and free-choice learning                                                             | Preadolescent girls of colour aged 9 to 13                              | 24 weeks      | Not specified | 2 hours       | 2/week        |
| 15 | Burnett, 2015                   | Providing opportunities for regular running to improve learners' fitness and health levels, with broader outcomes associated with life-skill education                            | School sports       | Running                                                                                                                                                               | The ecological systems theory (as proposed by Bronfenbrenner, 1979)<br>Life skill education<br>sport-for-development | 6th grade boys and girls, living in poverty                             | Not specified | Not specified | Not specified | 3/week        |
| 20 | Choi et al., 2015               | To develop youth life skills such as personal skills (e.g. goal-setting, life style management) and interpersonal skills (e.g. communication, social skills, conflict resolution) | After-school sports | During the physical activity time, the mentor introduced the sports skills of the day, such as badminton, table tennis, or soccer, and they played together           | PYD and life skill development                                                                                       | Boys and girls (mentees) aged 10 to 12                                  | 9 months      | 30            | Not specified | Not specified |
| 22 | Cryan and Martinek, 2017        | Teaching concepts such as respect, self-control, and teamwork                                                                                                                     | After-school sports | Soccer                                                                                                                                                                | TPSR and youth development                                                                                           | Low-income middle school boys aged 11 to 12 who exhibit risk behaviours | 9 weeks       | 10            | 2 hours       | 2/week        |

|    |                          |                                                                                                                                                                                                                                                                                          |                     |                                                    |                                                   |                                                                               |                                                                     |               |               |                                     |
|----|--------------------------|------------------------------------------------------------------------------------------------------------------------------------------------------------------------------------------------------------------------------------------------------------------------------------------|---------------------|----------------------------------------------------|---------------------------------------------------|-------------------------------------------------------------------------------|---------------------------------------------------------------------|---------------|---------------|-------------------------------------|
| 23 | DeBate and Bleck, 2016   | To address developmental assets commonly addressed in sport-based PYD programmes (e.g. character, competence, confidence, connection, and caring)                                                                                                                                        | After-school sports | Running                                            | PYD                                               | 3rd to 5th grade girls                                                        | 12 weeks                                                            | 24            | 90 min        | Not specified                       |
| 24 | Draper and Coalter, 2016 | Combining soccer and the teaching of life skills (i.e. leadership, problem solving, health education, team work, goal-setting, values, self-awareness, time management, conflict management, interpersonal skills, decision-making, self-confidence, prioritizing, optimizing education) | After-school sports | Soccer                                             | Bandura's social cognitive theory and life skills | Boys aged 11 to 20 from a community of low-income families in a deprived area | Not specified                                                       | Not specified | Not specified | 2/week life skills<br>3/week soccer |
| 25 | Driska et al., 2017      | Extending participants' boundaries mentally (mental coping skills. Teaching responsibility, accountability and hard work                                                                                                                                                                 | Sports camp         | Wrestling                                          | Not specified                                     | Boys and girls aged 14 to 18                                                  | 88 hours of physical training and 13 hours of mental attitude talks | Not specified | Not specified | daily                               |
| 26 | Escartí et al., 2010a    | Teaching responsibility through TPSR implementation (5 TPSR levels)                                                                                                                                                                                                                      | PE                  | Bat and field game, juggling, skating, and acrogym | PYD and TPSR                                      | Boys and girls aged 11 to 12 from working-middle class families               | 1 school year                                                       | Not specified | 60 min        | 2/week                              |

|    |                                |                                                                                                                                                                                                               |             |                                                    |                      |                                                                                                                 |                                   |                 |         |               |
|----|--------------------------------|---------------------------------------------------------------------------------------------------------------------------------------------------------------------------------------------------------------|-------------|----------------------------------------------------|----------------------|-----------------------------------------------------------------------------------------------------------------|-----------------------------------|-----------------|---------|---------------|
| 27 | Escartí et al., 2010b          | Teaching responsibility through TPSR implementation (5 TPSR levels)                                                                                                                                           | PE          | Physical activities (e.g. gymnastics skills)       | TPSR                 | Boys and girls aged 13 to 14, at risk of dropping out, from schools situated in low middle-class neighbourhoods | November - May of the school year | 30              | 90 min  | 2/week        |
| 28 | Ferguson and Shapiro, 2016     | Enhancing social skills (taking turns, giving verbal compliments, giving physical compliments, making a positive postgame comment) and teaching sport skills (throw-ins, dribbling, passing, and wall volley) | Sports camp | Soccer                                             | Not specified        | Children aged 8 to 12 with social skills deficits                                                               | 10 days over 2 consecutive weeks  | 8 training days | 3 hours | daily         |
| 29 | Fernández-Río and Suarez, 2016 | Refine basic locomotor skills with a priority on safety. Working in small heterogenous cooperative groups to capitalize on learning.                                                                          | PE          | Basic locomotor skills and specific parkour skills | Cooperative learning | Boys and girls aged 11 to 12                                                                                    | 12 lessons                        | 12              | 55 min  | Not specified |
| 31 | Folleto et al., 2016           | Enhancing cognitive, social and motor development. Supporting the autonomy of children, personal and group achievements, and the active participation in decision-making during the learning process.         | PE          | Yoga                                               | Not specified        | Boys and girls aged 6 to 8                                                                                      | 12 weeks                          | Not specified   | 45 min  | 2/week        |

|    |                                  |                                                                                                                                                                                                   |                     |                                                                                                                                                                            |                                |                                                            |                                                                                                                  |                                                       |               |               |
|----|----------------------------------|---------------------------------------------------------------------------------------------------------------------------------------------------------------------------------------------------|---------------------|----------------------------------------------------------------------------------------------------------------------------------------------------------------------------|--------------------------------|------------------------------------------------------------|------------------------------------------------------------------------------------------------------------------|-------------------------------------------------------|---------------|---------------|
| 34 | Fuller et al., 2013              | Promoting PYD and life skills (topics such as conflict resolution and peer pressure, with underlying themes of respect, responsibility, accountability, and leadership)                           | After-school sports | Both traditional (e.g. basketball and football) and culturally non-traditional (e.g. floor hockey and soccer) sports and other physical activities (e.g. capture the flag) | PYD and life skill development | Boys aged 10 to 14                                         | 24 weeks                                                                                                         | Not specified                                         | 2 hours       | 2/week        |
| 35 | García-Calvo et al., 2016        | Promoting positive behaviour (discipline, tolerance and respect for classmates, sportsmanship, cooperation and teamwork, assessment of effort, self-control, and respect for norms and materials) | PE                  | Not specified                                                                                                                                                              | PYD, TPSR and SDT              | Boys and girls aged 12 to 16                               | (1) 15 hours (training group)<br>(2) 10 sessions (didactic unit group)<br>(3) 15 hours (integral training group) | (1) 3 x 5 hours<br>(2) 10 sessions<br>(3) 3 x 5 hours | Not specified | Not specified |
| 36 | García-López and Gutiérrez, 2015 | Promoting empathy and assertiveness                                                                                                                                                               | PE                  | Handball                                                                                                                                                                   | Sport Education                | Boys and girls aged 11 to 14 from middle-class backgrounds | 18 sessions during second term                                                                                   | 18                                                    | Not specified | 2/week        |
| 37 | Gordon, 2010                     | Implementation of the Responsibility Model                                                                                                                                                        | PE                  | Dance, gymnastics, touch rugby and minor games                                                                                                                             | TPSR                           | Boys and girls aged 13 to 15                               | 6 months                                                                                                         | Not specified                                         | 60 min        | 2/week        |

|    |                             |                                                                                                                                                                                                                                |                     |                                                                     |                                                      |                                                                                       |                                                        |               |        |               |
|----|-----------------------------|--------------------------------------------------------------------------------------------------------------------------------------------------------------------------------------------------------------------------------|---------------------|---------------------------------------------------------------------|------------------------------------------------------|---------------------------------------------------------------------------------------|--------------------------------------------------------|---------------|--------|---------------|
| 38 | Gordon et al., 2016         | Building life skills and developing personal and social responsibility                                                                                                                                                         | After-school sports | Not specified (sport and PA)                                        | Social and emotional learning, TPSR, and Life skills | Disengaged boys aged 13 to 14                                                         | Over the course of two school years (September to May) | Not specified | 75 min | biweekly      |
| 39 | Gorucu, 2016                | Developing social and communication skills                                                                                                                                                                                     | PE                  | Volleyball, table tennis and football                               | Cooperative learning                                 | Secondary school senior year students                                                 | 10 weeks                                               | 10            | 40 min | 1/week        |
| 40 | Goudas and Giannoudis, 2008 | Promoting life skills (goal-setting, problem-solving strategies, and positive thinking) and teaching basketball and volleyball skills                                                                                          | PE                  | Basketball and volleyball                                           | PYD and life skill development                       | 6th year elementary and 2nd year junior high students from a middle-class area school | 17 sessions                                            | 17            | 1 hour | Not specified |
| 41 | Goudas and Giannoudis, 2010 | Teaching life skills: goal-setting, problem-solving strategies and positive thinking                                                                                                                                           | PE                  | Basketball and volleyball                                           | Life skill development                               | 6th and 8th grade boys and girls                                                      | 2 months (17 hours)                                    | 17            | 1 hour | 3/week        |
| 42 | Goudas and Magotsiou, 2009  | Interacting with peers, solving problems cooperatively, helping peers and receiving help for goal accomplishment, meeting personal goals through cooperative play, following or leading a group depending on the circumstances | PE                  | Basketball, volleyball, and traditional Greek dancing               | Cooperative learning and (partly) Sport Education    | 6th grade boys and girls                                                              | 13-units                                               | Not specified | 45 min | 3/week        |
| 44 | Gülay et al., 2010          | Cooperative games to enhance satisfaction from course, social interaction, and social communication. Encouraging cooperation, sharing, helping                                                                                 | PE                  | Cooperative games (e.g. Lion and Cow, Lemonade, Blanket Volleyball) | Cooperative games/learning                           | 9th grade girls                                                                       | 12 weeks                                               | 12            | 80 min | 1/week        |

behaviours, and creativity during the class.

|    |                             |                                                                                                                                                            |                     |                                                                                                 |                                |                                                        |                                                    |                                     |                                                                          |               |
|----|-----------------------------|------------------------------------------------------------------------------------------------------------------------------------------------------------|---------------------|-------------------------------------------------------------------------------------------------|--------------------------------|--------------------------------------------------------|----------------------------------------------------|-------------------------------------|--------------------------------------------------------------------------|---------------|
| 46 | Hardcastle et al., 2015     | Promoting life skills, psychological skills, self-regulation skills and coping skills                                                                      | After-school sports | Squash, softball, baseball, netball, triathlon, surfing                                         | PYD and life skill development | High performance athletes aged 13 to 18                | Not specified                                      | Not specified                       | Not specified                                                            | Not specified |
| 48 | Harwood et al., 2015        | Promoting behavioural responses associated with commitment, communication, concentration, control, and confidence                                          | After-school sports | Soccer                                                                                          | 5C's of PYD                    | Under-13 players at a professional soccer club academy | 18 weeks (3 weeks baseline, 15 weeks intervention) | 5 personal coach education sessions | Approx. 50 min                                                           | weekly        |
| 49 | Hayden et al., 2012         | Teaching responsibility                                                                                                                                    | School sports       | Physical activity: non-sport specific activities (e.g. strength building and athletic movement) | PYD and TPSR                   | Grade 9 - 12 boys and girls                            | Over the course of 1 school year                   | Not specified                       | 1 hour                                                                   | 2/week        |
| 50 | Hemphill and Richards, 2016 | Promoting PYD and the transfer of positive skills outside the programme, particularly to the school context                                                | After-school sports | Squash (single and double) and other PA                                                         | PYD and TPSR                   | 6th to 8th grade youth                                 | Over the course of 1 school year                   | Not specified                       | 90 min squash and other PA<br>90 min of academic enrichment              | 3 to 5/week   |
| 51 | Hodge et al., 2017          | Teaching the core values of hockey (commitment, perseverance, and teamwork) and improving communication skills (meeting and greeting) and emotional health | After-school sports | Ice hockey                                                                                      | PYD and life skill development | Underserved boys and girls aged 7 to 15                | 11 weeks                                           | 11 lessons                          | 60 min on-ice hockey practice<br>15 to 25 min off-ice education sessions | 1/week        |



|    |                                  |                                                                                                                                                                                                                                                          |                     |                                      |                                                            |                                     |                                  |               |                               |               |
|----|----------------------------------|----------------------------------------------------------------------------------------------------------------------------------------------------------------------------------------------------------------------------------------------------------|---------------------|--------------------------------------|------------------------------------------------------------|-------------------------------------|----------------------------------|---------------|-------------------------------|---------------|
| 54 | Koh et al., 2017                 | Promoting the school's four core values (i.e. integrity, resilience, commitment, and respect)                                                                                                                                                            | PE and sports       | PE and school football and floorball | Kolb's (1984) experiential learning theory                 | 6th grade students and athletes     | 10 weeks                         | Not specified | Not specified                 | Not specified |
| 55 | Koh et al., 2016                 | Promoting the school's four core values (i.e. integrity, resilience, commitment, and respect)                                                                                                                                                            | PE and sports       | PE and school soccer and floorball   | Kolb's (1984) experiential learning theory                 | Students and athletes aged 10 to 12 | 10 weeks                         | Not specified | Not specified                 | Not specified |
| 56 | Lang et al., 2016                | Addressing basic knowledge about the development of stress and improving emotion- and problem-focused coping.                                                                                                                                            | PE                  | Coping training and motor learning   | Drawing on the experiential learning theory of Kolb (1984) | Vocational students                 | 3 months                         | Not specified | 90 min of which 20 min EPHECT | weekly        |
| 57 | Lee et al., 2017                 | Teaching sport and life skills. Individual player skills (e.g. participation), team player skills (e.g. playing with and for others), competing player skills (e.g. playing against all odds), and thriving player skills (e.g. setting long-term goals) | After-school sports | Soccer                               | PYD and life skill development                             | 4th to 5th grade boys and girls     | 12 weeks                         | Not specified | Not specified                 | Not specified |
| 60 | Luptáková and Antala, 2017       | Collaborative learning (collaboration) and specific role/responsibility                                                                                                                                                                                  | PE                  | Not specified                        | Collaborative learning                                     | Boys and girls aged 11 to 15        | 9 weeks                          | Not specified | Not specified                 | 1/week        |
| 61 | Malinauskas and Juodsnukis, 2017 | Enhancing social responsibility (caring and helping, and respect)                                                                                                                                                                                        | School sports       | Football                             | TPSR                                                       | Male football sport school students | 14.58 hours during 1 school year | 35            | 25 min                        | Not specified |

|    |                     |                                                                                                                                                                                                                                       |                     |                                                                                  |                                                                                |                                                                                               |                       |               |               |                             |
|----|---------------------|---------------------------------------------------------------------------------------------------------------------------------------------------------------------------------------------------------------------------------------|---------------------|----------------------------------------------------------------------------------|--------------------------------------------------------------------------------|-----------------------------------------------------------------------------------------------|-----------------------|---------------|---------------|-----------------------------|
| 65 | Nathan et al., 2013 | Promoting health and well-being, social inclusion, connectedness, and cross-cultural engagement.                                                                                                                                      | After-school sports | Football                                                                         | Social-ecological framework underlying the programme                           | Boys and girls aged 11 to 18 who had arrived in Australia as refugee or humanitarian entrants | 10-week terms         | Not specified | Not specified | Not specified               |
| 67 | Newin et al., 2008  | Promoting distinctiveness, team norms individual positions, interaction and communication, individual sacrifices while focusing on teamwork, organization, communication, and cooperation                                             | After-school sports | Ice hockey and team-building (e.g. alphabet balance beam and the rope challenge) | The conceptual framework of team building developed by Carron and Spink (1993) | Ice hockey players aged 11 to 13                                                              | throughout the season | 5             | 30 min        | approximately every 3 weeks |
| 68 | Parise et al., 2015 | Teaching game culture and values of rugby, tackling, passing the ball, support to the team mate                                                                                                                                       | School sports       | Rugby                                                                            | Not specified                                                                  | Boys and girls aged 11 to 15                                                                  | 3 months              | Not specified | Not specified | 1/week                      |
| 69 | Park et al., 2017   | Adjusting to the new PA and movements involving body weight, tolerating full body-weight training and improving cardiopulmonary capacity, increasing cardiopulmonary capacity and maintaining their enhanced physical fitness levels. | PE                  | Not specified                                                                    | Not specified                                                                  | Boys and girls from multicultural families                                                    | 8 weeks               | Not specified | Not specified | Not specified               |

|    |                                  |                                                                                                                                                                                                                |                     |                                                                                                                                               |                        |                                                                                         |               |               |                                                                                        |                               |
|----|----------------------------------|----------------------------------------------------------------------------------------------------------------------------------------------------------------------------------------------------------------|---------------------|-----------------------------------------------------------------------------------------------------------------------------------------------|------------------------|-----------------------------------------------------------------------------------------|---------------|---------------|----------------------------------------------------------------------------------------|-------------------------------|
| 70 | Riley and Anderson-Butcher, 2012 | Promoting self-control, effort, teamwork, and social responsibility (primary outcomes), social competence (secondary outcome), and healthy youth development and overall child well-being (long term outcomes) | Summer camp         | Sport activities and play-based education activity                                                                                            | PYD and TPSR           | Boys and girls aged 11 to 13 from low-income families                                   | 19 days       | Not specified | 1h social competence education<br>3h sport enhanced with social competence instruction | daily                         |
| 71 | Riley et al., 2017               | Fostering social competence                                                                                                                                                                                    | Summer camp         | Basketball, football, health and fitness, lacrosse, soccer, social dance, softball, swimming, volleyball, and play-based education activities | PYD                    | Boys and girls aged 9 to 15, vulnerable youth, youth of colour and/or living in poverty | 19 days       | Not specified | 6 hour/day                                                                             | daily                         |
| 72 | Rodríguez et al., 2016           | Reducing aggression and promoting prosocial values                                                                                                                                                             | After-school sports | Sport-recreational activities: football, basketball, athletics, wrestling and volleyball                                                      | Not specified          | Male adolescents living in social risk                                                  | Not specified | 25            | 1 hour                                                                                 | 2/week                        |
| 73 | Salazar et al., 2016             | Stimulate motor, cognitive, social and interpersonal skills                                                                                                                                                    | Summer camp         | swimming, volleyball, basketball, aerial dance, tennis, indoor soccer, soccer, karate, flag football, recreational activities and handball    | Life skill development | Boys and girls aged 6 to 16                                                             | 5 weeks       | Not specified | Not specified                                                                          | Daily (Monday through Friday) |

|    |                             |                                                                                                                                                                                                                                   |                     |                                                                      |                                                                                                                   |                                                                          |                                                                       |               |                                                           |                                                                                                                 |
|----|-----------------------------|-----------------------------------------------------------------------------------------------------------------------------------------------------------------------------------------------------------------------------------|---------------------|----------------------------------------------------------------------|-------------------------------------------------------------------------------------------------------------------|--------------------------------------------------------------------------|-----------------------------------------------------------------------|---------------|-----------------------------------------------------------|-----------------------------------------------------------------------------------------------------------------|
| 74 | Schaillée, et al., 2017     | Promoting PYD                                                                                                                                                                                                                     | After-school sports | Urban dance                                                          | PYD                                                                                                               | Disadvantaged girls aged 11 to 19                                        | Not specified<br>(Participants had been enrolled for at least 1 year) | Not specified | Not specified                                             | Varies from 1/week to more than 1 class/week                                                                    |
| 75 | Senécal et al., 2008        | Promoting team goal-setting                                                                                                                                                                                                       | School sports       | Basketball                                                           | Eys, Patterson, Loughead, and Carron's (2006) three-stage protocol for implementing a team goal-setting programme | Female high school senior basketball players aged 14 to 18               | 5-month regular season                                                | Not specified | 20 to 30 min                                              | 2 practices/week<br>1 game/week<br><i>Team goal-setting sessions occurred prior to the start of a practice.</i> |
| 76 | Sinelnikov and Hastie, 2008 | Learning skills, participating in roles and fair play                                                                                                                                                                             | PE                  | Basketball                                                           | Sport Education and Doyle's ecological paradigm (1977)                                                            | 9th grade boys and girls, majority came from upper middle-class families | 18 lessons                                                            | 18            | 2 academic hours regular PE<br>1 elective period extra PE | 2 academic hours/week regular PE<br>1/week elective period extra PE                                             |
| 77 | Ullrich-French et al., 2012 | To engage participants and develop life skills for academic, social, and physical domains (caring, respect, responsibility, trustworthiness, citizenship, and fairness). Promoting personal improvement and lifestyle activities. | Summer camp         | Sports and other PA (e.g. swimming, fitness, and recreational games) | PYD                                                                                                               | Low income boys and girls aged 9 to 16                                   | 4 weeks                                                               | Not specified | 8 am to 2 pm                                              | 5 days/week                                                                                                     |

|     |                       |                                                                                                                                                                   |                     |                                   |                                                                          |                                                                                                                                    |                                                              |               |               |               |
|-----|-----------------------|-------------------------------------------------------------------------------------------------------------------------------------------------------------------|---------------------|-----------------------------------|--------------------------------------------------------------------------|------------------------------------------------------------------------------------------------------------------------------------|--------------------------------------------------------------|---------------|---------------|---------------|
| 78  | Vidoni and Ward, 2009 | Fair play instruction ('give your best effort,' and 'be helpful, not harmful.')                                                                                   | PE                  | Tag Rugby                         | Sport Education and Fair Play Instruction                                | 8th grade boys and girls                                                                                                           | 18 days                                                      | 18            | 40 min        | biweekly      |
| 79  | Vierimaa et al., 2017 | Emphasizing physical, social, and emotional development. Learning basketball skills, sportspersonship, and having fun.                                            | After-school sports | Basketball                        | PYD, life skill development, and the Personal Assets Framework for Sport | Boys and girls aged 8 to 14, the league is accessible to a wide range of youth since it is located in a lower income neighbourhood | 6-month season(s)                                            | Not specified | 45-min game   | 1 game/week   |
| 81  | Walsh et al., 2010    | To take responsibility for coaching themselves and for coaching and providing leadership for others in the programme, and transference of these responsibilities. | School sports       | Basketball practice and game play | TPSR and life skills and transfer                                        | Boys and girls aged 9 to 11 from a school located in a predominantly low-income and minority neighbourhood                         | 2 consecutive school years                                   | 45            | 1 hour        | 1/week        |
| 82a | Weiss et al., 2016    | Teaching life skills and enhancing core values                                                                                                                    | After-school sports | Golf                              | PYD                                                                      | Boys and girls aged 10 to 17                                                                                                       | Not specified in this article, see Weiss et al., 2013        | Not specified | Not specified | Not specified |
| 82b | (Study 2)             | Teaching life skills and enhancing core values                                                                                                                    | After-school sports | Golf                              | PYD                                                                      | Boys and girls aged 10 to 17 (Time 1)                                                                                              | At least 3 consecutive years of involvement in the programme | Not specified | Not specified | Not specified |

|    |                         |                                                                                                                                                                                |         |                                                                                                                                                                                    |                                 |                                                                                                                                   |                             |               |               |                                    |
|----|-------------------------|--------------------------------------------------------------------------------------------------------------------------------------------------------------------------------|---------|------------------------------------------------------------------------------------------------------------------------------------------------------------------------------------|---------------------------------|-----------------------------------------------------------------------------------------------------------------------------------|-----------------------------|---------------|---------------|------------------------------------|
| 83 | Weiss et al., 2015      | Improving health and fitness (e.g. reduce obesity risk), psychosocial attributes (e.g. self-perceptions), academic achievement, and behavioural conduct (e.g. fewer absences). | PE      | Fitness curriculum focusing on motor skills, flexibility, speed, agility, strength, balance, coordination, endurance, and teamwork through individual circuits and tactical games) | PYD                             | Boys and girls aged 11 to 14                                                                                                      | 8 months during school year | Not specified | 45 min        | 2/week (in addition to regular PE) |
| 87 | Wright and Burton, 2008 | To teach self-control and participation, goal-setting, life skills. Stress reduction. Taking on responsibility.                                                                | PE      | Tai Chi                                                                                                                                                                            | Life skill development and TPSR | Students from a high school located in a neighbourhood with high rates of poverty.                                                | 10 weeks                    | 20            | Not specified | 2/week                             |
| 88 | Wright et al., 2010     | Teaching the 5 core goals                                                                                                                                                      | TPSR PE | Tai Chi                                                                                                                                                                            | TPSR                            | Boys and girls aged 14 to 18, from a school that was on the state's failing list for achievement, graduation and attendance rates | 18 lessons                  | 18            | 1 hour        | 1/week                             |

---
